# Supplementary material
Source: MDPI journal article supplement (https://www.mdpi.com/1996-1073/16/24/7981)
Supplement: s1 [file s1]

## Supporting Information

# Density Functional Theory Optimization of Cobalt- and Nitrogen-Doped Graphene Catalysts for Enhanced Oxygen Evolution Reaction

Jiatang Wang <sup>1</sup>, Huawei He <sup>1</sup>, Weiwei Cai <sup>1,\*</sup>, Chao Yang <sup>2</sup>, Yu Wu <sup>3</sup>, Houcheng Zhang <sup>4,\*</sup>, Rui Liu <sup>1</sup> and Hansong Cheng <sup>1</sup>

<sup>1</sup> Sustainable Energy Laboratory, Faculty of Materials Science and Chemistry, China University of Geosciences, Wuhan 430074, China

<sup>2</sup> Shanghai Frontiers Science Center of "Full Penetration" Far-Reaching Offshore Ocean Energy and Power, Merchant Marine College, Shanghai Maritime University, Shanghai 201306, China

<sup>3</sup> College of Engineering Science and Technology, Shanghai Ocean University, Shanghai 201306, China

<sup>4</sup> College of New Energy, Ningbo University of Technology, Ningbo 315211, China

\* Correspondence: willcai1985@gmail.com (W.C.); hc Zhang@nbut.edu.cn (H.Z.)

# Supplementary Figures:

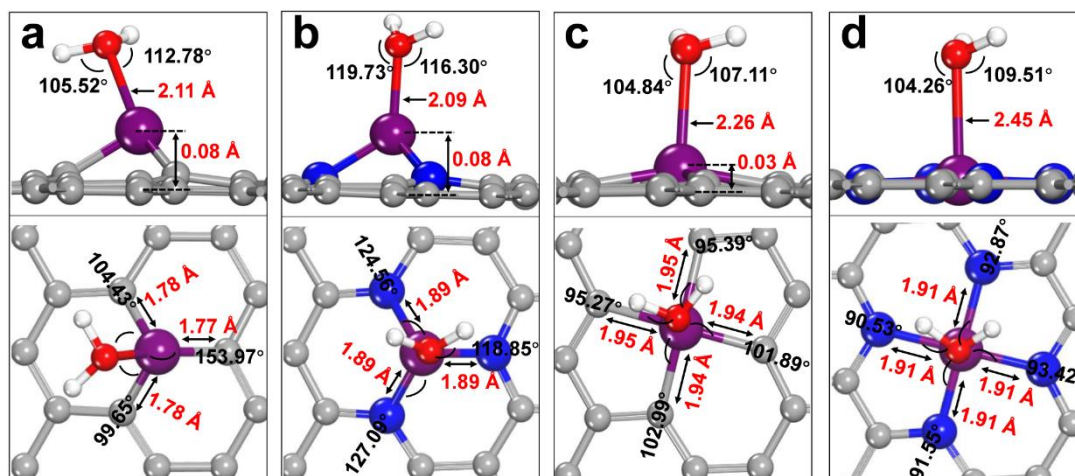

**Figure S1.** Bond lengths and bond angles of the stable Co-N-g catalyst of (a) SV-GN, (b) SV-N3, (c) DV-GN, and (d) DV-N4.

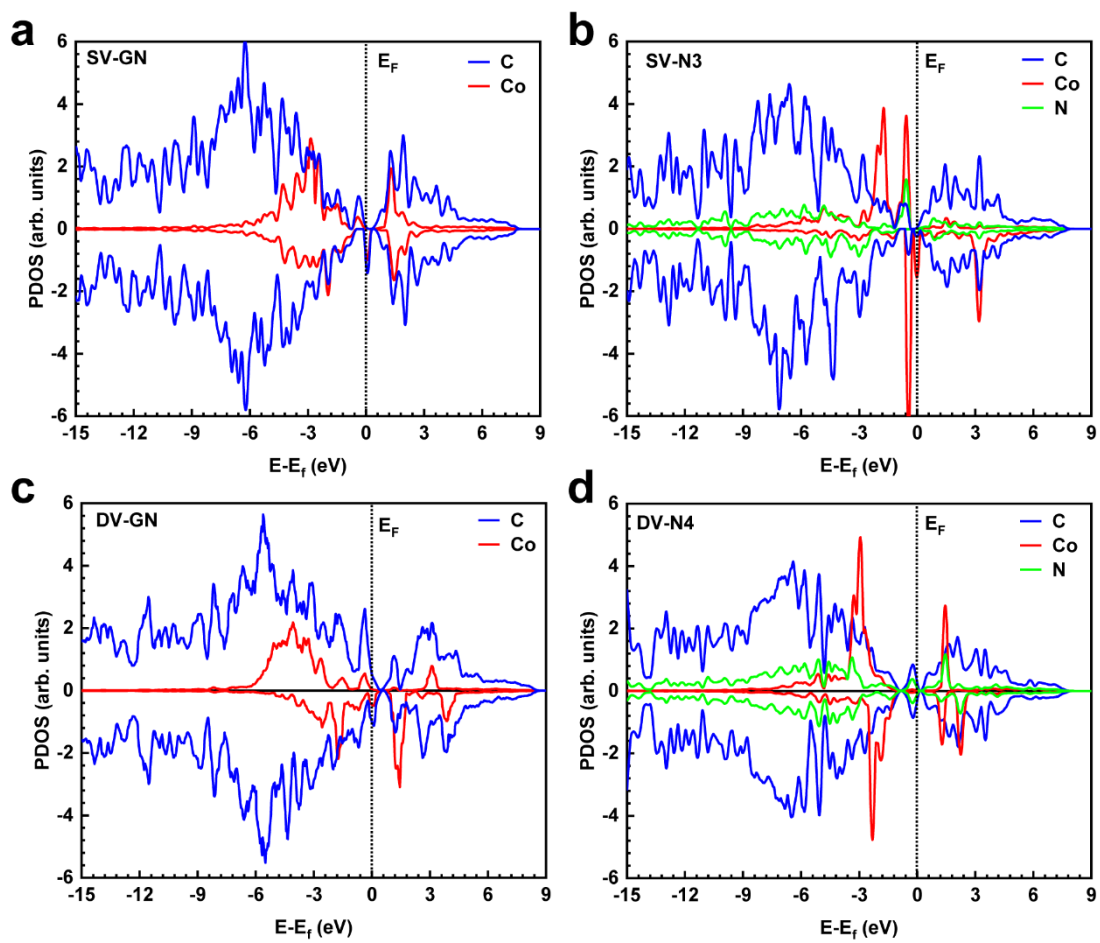

**Figure S2.** PDOS of specified elements C (blue), Co (red) and N (green), for Co-N-g catalyst of (a) SV-GN, (b) SV-N3, (c) DV-GN, and (d) DV-N4.

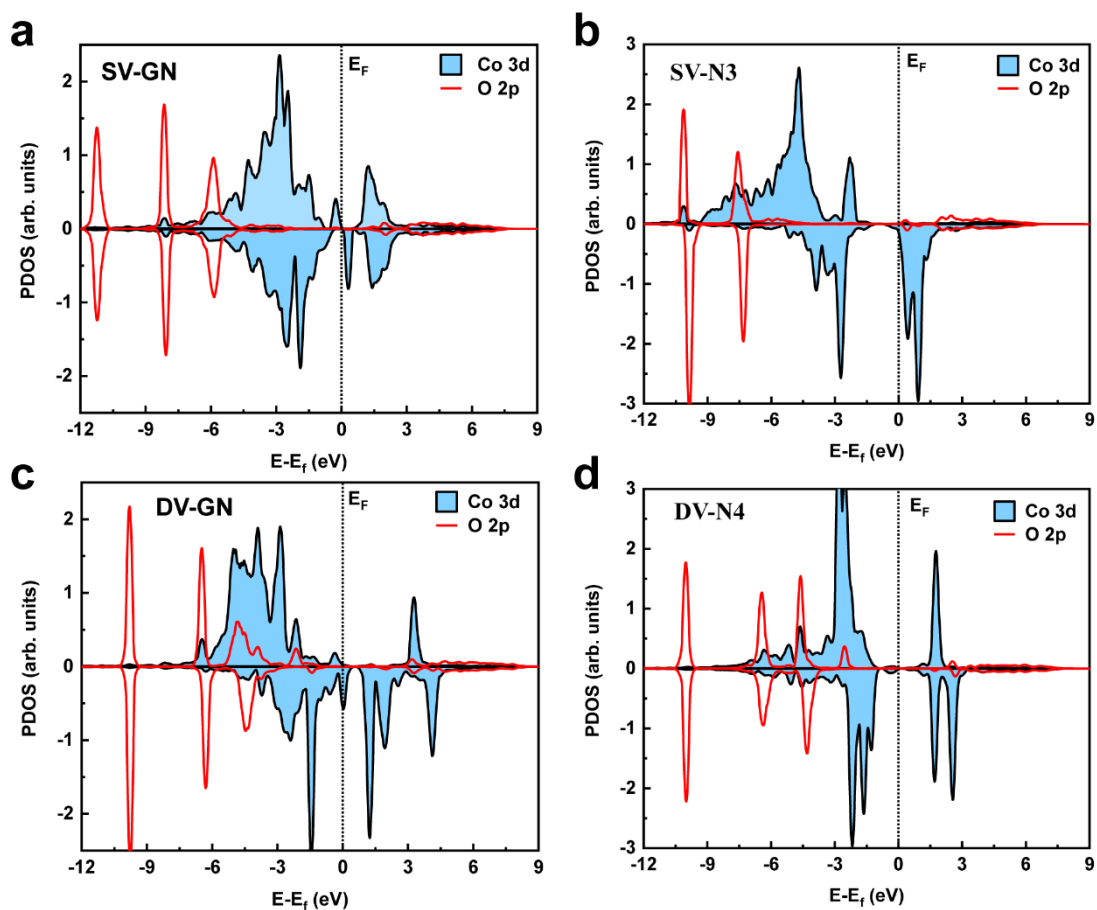

**Figure S3.** PDOS of Co-3d (blue) and O-2p states (red) after H<sub>2</sub>O adsorption on the catalyst surface.

**Table S1.** Bader charge and d-band center values of SV-GN, SV-N3, DV-GN, and DV-N4 catalysts with H<sub>2</sub>O adsorbed.

| Catalysts | Bader charge (eV) |                                              | d-band center (eV)                          |                                              |
|-----------|-------------------|----------------------------------------------|---------------------------------------------|----------------------------------------------|
|           | Co of catalysts   | Co of H <sub>2</sub> O adsorbed on catalysts | O of H <sub>2</sub> O adsorbed on catalysts | Co of H <sub>2</sub> O adsorbed on catalysts |
| SV-GN     | 0.50              | 0.63                                         | -1.19                                       | -2.45                                        |
| SV-N3     | 0.73              | 1.06                                         | -1.24                                       | -5.22                                        |
| DV-GN     | 0.84              | 0.92                                         | -1.29                                       | -3.39                                        |
| DV-N4     | 0.95              | 0.98                                         | -1.25                                       | -2.68                                        |

**Table S2.** HOMO, LUMO, and HOMO-LUMO gap<sup>a</sup> of  $\alpha$  electrons and  $\beta$  electrons for SV-GN, SV-N3, DV-GN, and DV-N4 catalysts with H<sub>2</sub>O adsorbed. The unit is eV.

|                  | SV-GN                |                     | SV-N3                |                  | DV-GN                |                     | DV-N4                |                     |
|------------------|----------------------|---------------------|----------------------|------------------|----------------------|---------------------|----------------------|---------------------|
|                  | $\alpha$<br>electron | $\beta$<br>electron | $\alpha$<br>electron | $\beta$ electron | $\alpha$<br>electron | $\beta$<br>electron | $\alpha$<br>electron | $\beta$<br>electron |
| HOMO             | -7.99                | -8.79               | -6.41                |                  | -8.95                | -8.29               | -8.46                | -7.32               |
| LUMO             | -0.10                | -0.13               | -3.27                |                  | -0.79                | -0.99               | -0.13                | -0.04               |
| HOMO-LUMO<br>gap | 7.89                 | 8.66                | 3.14                 |                  | 8.16                 | 7.30                | 8.33                 | 7.28                |

<sup>a</sup> HOMO-LUMO gap is the difference between LUMO and HOMO energy levels.
